# Supplementary material for: Managing snakebite
Source: PubMed Central journal article supplement — BMJ. 2022 Jan 7;376:e057926. doi: 10.1136/bmj-2020-057926 (PMC9278408; doi:10.1136/bmj-2020-057926), 2022-01-07
Supplement: ravr057926.w1.pdf [file ravr057926.w1.pdf]

## Supplementary text: How do snake venoms act?

Snake venoms exert a wide range of toxic activities at multiple sites in the body. A few protein families contain the bulk of venom toxins. These include enzymes like phospholipases A<sub>2</sub>, metalloproteinases, serine proteinases and L-amino acid oxidases and non-enzymatic proteins like three-finger neurotoxins, kunitz type protease inhibitors, disintegrins and snake C-type lectins.<sup>1</sup> The proportion of these protein/toxin families varies between snake families, between species and in some instances even within species, which explains the great variety of clinical manifestations that occur following envenoming.<sup>2,3</sup> These toxins function in different combinations to disrupt blood clotting, vessel walls, cell membranes and neuromuscular transmission. They also trigger an inflammatory cascade which contributes to further tissue damage. Figure-S1 outlines important sites of action and major effects of snake venom toxins.

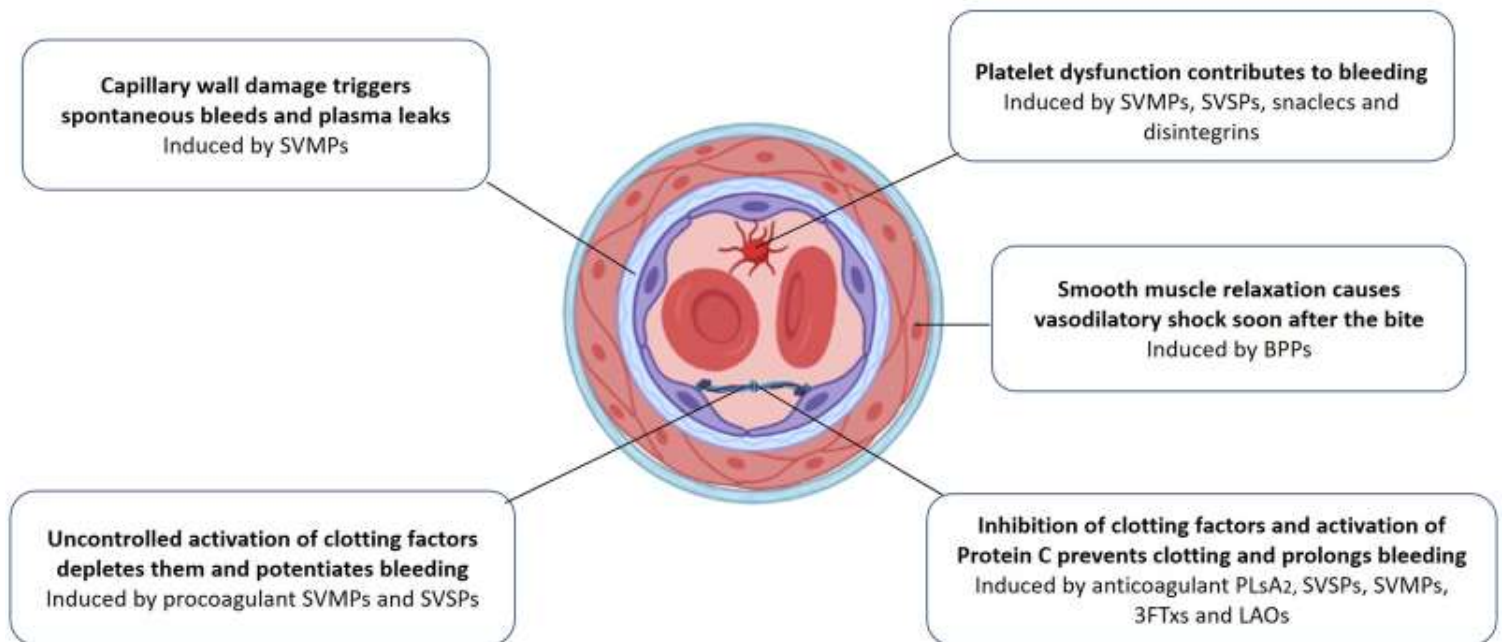

Figure S1a- Actions of snake venom toxins on the vessel wall and the hemostatic system<sup>4-6</sup>  
 SVMP snake venom metalloproteases, SVSP snake venom serine protease, snaclecs snake C-type lectins, BPPs bradykinin potentiating peptides, PLsA<sub>2</sub> Phospholipases A<sub>2</sub>, 3FTxs three finger toxins and LAOs L-amino acid oxidases

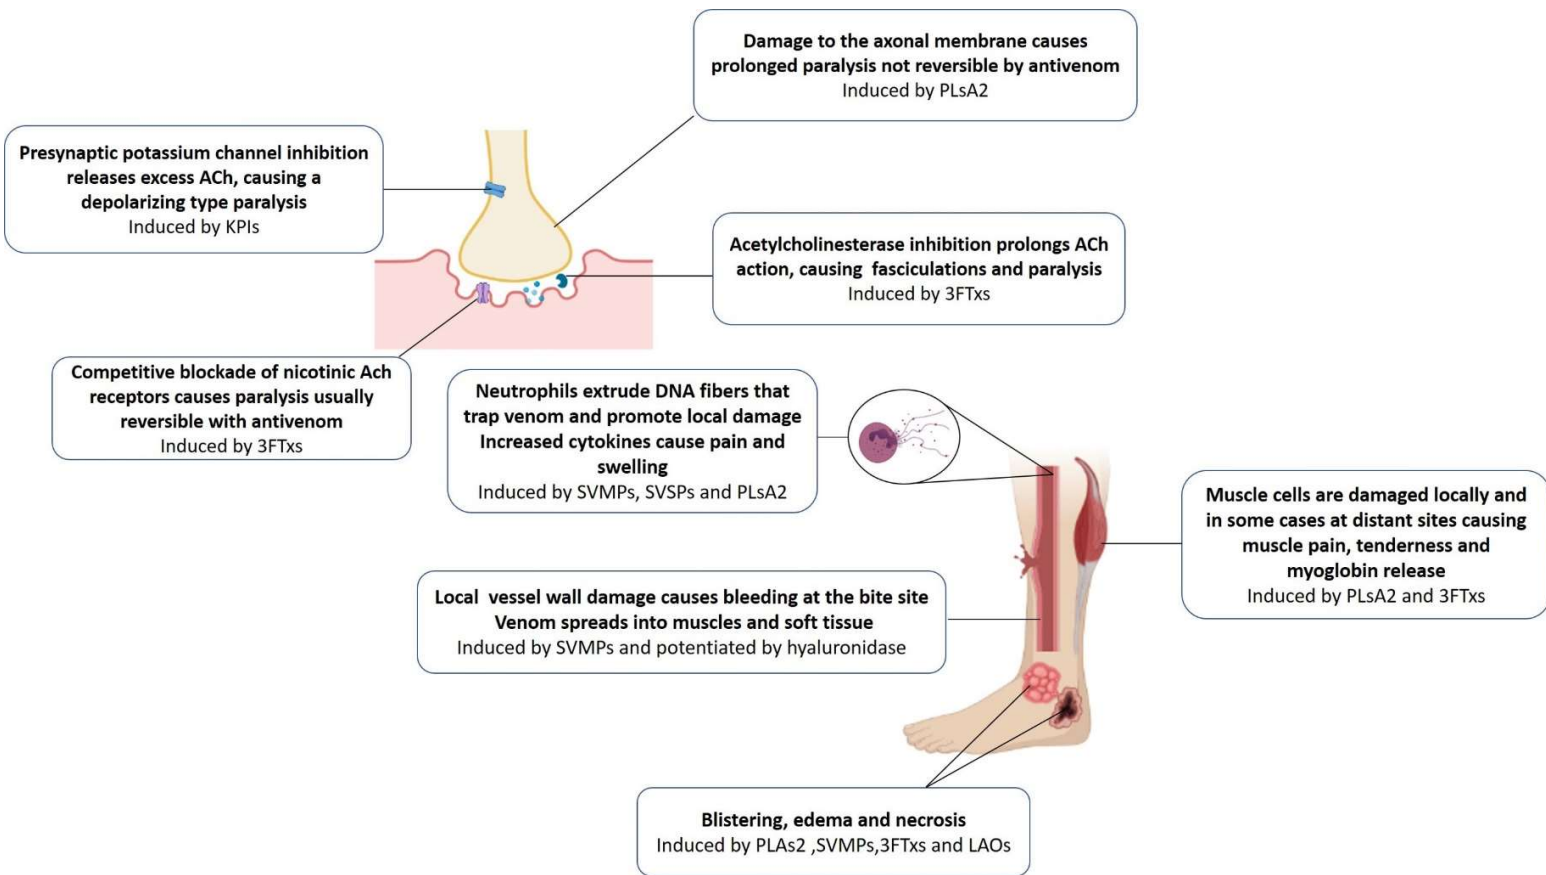

Figure S1b - Actions of snake venom toxins on the components of the neuromuscular junction, at the site of the bite and on local and distant skeletal muscles<sup>4,7-9</sup>

KPI Kunitz type serine protease inhibitor, SVMP snake venom metalloproteases, SVSP snake venom serine protease, PLA<sub>2</sub> Phospholipases A<sub>2</sub>, 3FTxs three finger toxins and LAOs L-amino acid oxidases

## References

1. Tasoulis T, Isbister GK. A Review and Database of Snake Venom Proteomes. *Toxins*. 2017 18;9(9).
2. Gutiérrez JM, Calvete JJ, Habib AG, Harrison RA, Williams DJ, Warrell DA. Snakebite envenoming. *Nat Rev Dis Primer*. 2017 Sep 14;3(1):1–21.
3. Ralph R, Sharma SK, Faiz MA, Ribeiro I, Rijal S, Chappuis F, et al. The timing is right to end snakebite deaths in South Asia. *BMJ*. 2019 Jan 22;364:k5317.
4. Slagboom J, Kool J, Harrison RA, Casewell NR. Haemotoxic snake venoms: their functional activity, impact on snakebite victims and pharmaceutical promise. *Br J Haematol*. 2017 Jun;177(6):947–59.
5. Udayabhaskaran V, Arun Thomas ET, Shaji B. Capillary Leak Syndrome Following Snakebite Envenomation. *Indian J Crit Care Med Peer-Rev Off Publ Indian Soc Crit Care Med*. 2017 Oct;21(10):698–702.
6. Kini RM. Anticoagulant proteins from snake venoms: structure, function and mechanism. *Biochem J*. 2006 Aug 1;397(3):377–87.
7. Ferraz CR, Arrahman A, Xie C, Casewell NR, Lewis RJ, Kool J, et al. Multifunctional toxins in snake venoms and therapeutic implications: From pain to hemorrhage and necrosis. *Front Ecol Evol*. 2019 Jan 1;7(JUN):218.
8. Ranawaka UK, Lalloo DG, de Silva HJ. Neurotoxicity in Snakebite—The Limits of Our Knowledge. *PLoS Negl Trop Dis* [Internet]. 2013 Oct 10 [cited 2020 Apr 19];7(10). Available from: <https://www.ncbi.nlm.nih.gov/pmc/articles/PMC3794919/>
9. Williams HF, Layfield HJ, Vallance T, Patel K, Bicknell AB, Trim SA, et al. The Urgent Need to Develop Novel Strategies for the Diagnosis and Treatment of Snakebites. *Toxins* [Internet]. 2019 Jun 20 [cited 2020 Jun 28];11(6). Available from: <https://www.ncbi.nlm.nih.gov/pmc/articles/PMC6628419/>
